# Supplementary material for: Anti-Hypertensive Medication Use, Soluble Receptor for Glycation End Products and Risk of Pancreatic Cancer in the Women’s Health Initiative Study
Source: MDPI journal article supplement (doi:10.3390/jcm7080197), 2018-08-02
Supplement: s1 [file s1]

Supplementary Table S1. Baseline antihypertensive medication use status in association with risk of incident pancreatic cancer among subjects with self-report hypertension

| Medication ever use<br>(Cases/P-yr) | Reference groups<br>(Cases/P-yr)                        | HR (95% CI) <sup>1</sup> |
|-------------------------------------|---------------------------------------------------------|--------------------------|
| ACEi<br>(73/150,417)                | Use of other anti-HT meds <sup>2</sup><br>(158/307,883) | 0.96 (0.73-1.27)         |
|                                     | Non-use of any anti-HT meds<br>(83/169,326)             | 0.89 (0.65-1.22)         |
| β-blockers<br>(50/113,231)          | Use of other anti-HT meds <sup>2</sup><br>(181/345,070) | 0.85 (0.62-1.16)         |
|                                     | Non-use of any anti-HT meds<br>(83/169,326)             | 0.80 (0.57-1.14)         |
| CCBs<br>(98/154,604)                | Use of other anti-HT meds <sup>2</sup><br>(133/303,696) | 1.32 (1.01-1.71)         |
|                                     | Non-use of any anti-HT meds<br>(83/169,326)             | 1.08 (0.81-1.44)         |
| Diuretics<br>(102/208,536)          | Use of other anti-HT meds <sup>2</sup><br>(129/249,764) | 0.90 (0.69-1.16)         |
|                                     | Non-use of any anti-HT meds<br>(83/169,326)             | 0.86 (0.64-1.15)         |

<sup>1</sup> Competing-risk model adjusted for age at baseline, race/ethnicity (non-Hispanic White, Black, Hispanic, Asian or Pacific Islander, and American Indian/Alaska Native), BMI (<25, 25-<30, ≥30 kg/m<sup>2</sup>), smoking status (never, former, current), alcohol consumption (< 3 drinks/day and ≥ 3 drinks/day), and self-reported type 2 diabetes at baseline (yes or no).

<sup>2</sup> Use of other anti-HT medications (not including the one under study).

Supplementary Table S2. Use and duration of use of DHP- and non-DHP CCBs in association with risk of incident pancreatic cancer

| <b>Medication Use</b>                   | <b>Cases/P-yrs</b> | <b>HR (95% CI)<sup>1</sup></b> | <b>HR (95% CI)<sup>2</sup></b> |
|-----------------------------------------|--------------------|--------------------------------|--------------------------------|
| Use of other anti-HT drugs <sup>3</sup> | 193/411,065        | 1.00 (ref.)                    | 1.00 (ref.)                    |
| Dihydropyridine CCBs ever use           | 78/131,592         | 1.22 (0.93-1.58)               | 1.19 (0.9-1.55)                |
| Dihydropyridine CCBs use < 3 years      | 36/63,512          | 1.18 (0.82-1.68)               | 1.15 (0.81-1.65)               |
| Dihydropyridine CCBs use ≥ 3 years      | 42/68,080          | 1.25 (0.89-1.74)               | 1.22 (0.87-1.70)               |
| <i>P</i> trend                          |                    | 0.238                          | 0.376                          |
| Use of other anti-HT drugs <sup>3</sup> | 234/498,435        | 1.00 (ref.)                    | 1.00 (ref.)                    |
| Non-dihydropyridine CCBs ever use       | 37/44,223          | 1.67 (1.18-2.36)               | 1.61 (1.14-2.28)               |
| Non-dihydropyridine CCBs use <3         | 13/22,112          | 1.20 (0.69-2.10)               | 1.16 (0.66-2.03)               |
| Non-dihydropyridine CCBs use ≥ 3        | 24/22,110          | 2.12 (1.39-3.22)               | 2.04 (1.34-3.11)               |
| <i>P</i> trend                          |                    | 0.001                          | <0.001                         |

Abbreviations: CCB=Calcium channel blocker; DHP= Dihydropyridine; P-yrs=Person-years; sRAGE=soluble receptor for advance glycation end products

<sup>1</sup> Adjusted for age at baseline, race/ethnicity (White (non-Hispanic), Black, Hispanic, Asian or Pacific Islander, and American Indian/Alaska Native), BMI (<25, 25-<30 and ≥30 kg/m<sup>2</sup>), smoking status (never, former and current), alcohol consumption (< 3 drinks/day and ≥ 3 drinks/day), self-reported type 2 diabetes at baseline (yes or no), and self-reported hypertension at baseline (yes or no)

<sup>2</sup> Competing risks model with same covariates in (1).

<sup>3</sup> Use of other anti-HT drugs include all the rest anti-HT medications studied other than the one of interest

Supplementary Table S3. Baseline CCB use and risk of incident pancreatic cancer by potential effect modifiers in the WHI Study

| Strata                | Use status                                   | Case/Person-years | HR (95% CI) <sup>1</sup> |
|-----------------------|----------------------------------------------|-------------------|--------------------------|
| BMI<25                | Ever use of other anti-HT drugs <sup>2</sup> | 25/83,745         | 1.00 (ref.)              |
|                       | Ever CCB use                                 | 33/39,949         | 2.38 (1.42-4.03)         |
| BMI 25-<30            | Ever use of other anti-HT drugs <sup>2</sup> | 49/113,587        | 1.00 (ref.)              |
|                       | Ever CCB use                                 | 33/59,204         | 1.17 (0.76-1.83)         |
| BMI≥30                | Ever use of other anti-HT drugs <sup>2</sup> | 66/133,233        | 1.00 (ref.)              |
|                       | Ever CCB use                                 | 48/75,977         | 1.22 (0.84-1.78)         |
| <i>P</i> -interaction |                                              | 0.37              |                          |
| WHR<0.8               | Ever use of other anti-HT drugs <sup>2</sup> | 47/134,784        | 1.00 (ref.)              |
|                       | Ever CCB use                                 | 32/63,300         | 1.31 (0.84-2.10)         |
| WHR≥0.8               | Ever use of other anti-HT drugs <sup>2</sup> | 93/195,817        | 1.00 (ref.)              |
|                       | Ever CCB use                                 | 82/111,849        | 1.42 (1.06-1.92)         |
| <i>P</i> -interaction |                                              | 0.22              |                          |
| No CVD                | Ever use of other anti-HT drugs <sup>2</sup> | 98/231,525        | 1.00 (ref.)              |
|                       | Ever CCB use                                 | 62/106,015        | 1.33 (0.97-1.83)         |
| CVD                   | Ever use of other anti-HT drugs <sup>2</sup> | 34/79,141         | 1.00 (ref.)              |
|                       | Ever CCB use                                 | 42/59,195         | 1.43 (0.91-2.28)         |
| <i>P</i> -interaction |                                              | 0.74              |                          |
| No diabetes           | Ever use of other anti-HT drugs <sup>2</sup> | 124/22,516        | 1.00 (ref.)              |
|                       | Ever CCB use                                 | 99/12,198         | 1.44 (1.10-1.89)         |
| Diabetes              | Ever use of other anti-HT drugs <sup>2</sup> | 16/2,534          | 1.00 (ref.)              |
|                       | Ever CCB use                                 | 15/1,902          | 1.26 (0.62-2.56)         |
| <i>P</i> -interaction |                                              | 0.72              |                          |

Abbreviations: anti-HT=anti-hypertensive; BMI=body mass index; CCB=calcium channel blocker; CI=confidence interval; CVD=cardiovascular disease; HR=hazard ratio; WHR=waist-to-hip ratio.

<sup>1</sup> Competing risk model adjusted for age at baseline, race/ethnicity (Non-Hispanic white, Black, Hispanic, Asian or Pacific Islander, and American Indian/Alaska Native), BMI (<25, 25-<30 and ≥30 kg/m<sup>2</sup>, not adjusted when stratified by BMI), smoking status (never, former and current), alcohol consumption (< 3 drinks/day and ≥ 3 drinks/day), self-reported type II diabetes at baseline (yes or no, not adjusted when stratified by diabetes status), and self-reported hypertension at baseline (yes or no).

<sup>2</sup> Ever use of anti-HT drugs other than the one of interest.

Supplementary Table S4. Duration of CCB use at baseline and risk of incident pancreatic cancer after excluding first 2 years of follow-up

| <b>Medication ever use<br/>(Cases/P-yrs)</b> | <b>Reference groups<br/>(Cases/P-yrs)</b>               | <b>HR (95% CI)<sup>1</sup></b> |
|----------------------------------------------|---------------------------------------------------------|--------------------------------|
| ACEi<br>(61/143,372)                         | Use of other anti-HT meds <sup>2</sup><br>(178/398,445) | 0.94 (0.70-1.27)               |
|                                              | Non-use of any anti-HT meds<br>(526/1,453,512)          | 0.93 (0.68-1.28)               |
| β-blockers<br>(52/146,847)                   | Use of other anti-HT meds <sup>2</sup><br>(187/394,970) | 0.76 (0.56-1.04)               |
|                                              | Non-use of any anti-HT meds<br>(526/1,453,512)          | 0.80 (0.58-1.10)               |
| CCBs<br>(100/174,968)                        | Use of other anti-HT meds <sup>2</sup><br>(139/366,850) | 1.44 (1.12-1.87)               |
|                                              | Non-use of any anti-HT meds<br>(526/1,453,512)          | 1.24 (0.95-1.62)               |
| Diuretics<br>(106/248,018)                   | Use of other anti-HT meds <sup>2</sup><br>(133/293,799) | 0.92 (0.71-1.19)               |
|                                              | Non-use of any anti-HT meds<br>(526/1,453,512)          | 0.93 (0.72-1.20)               |

Abbreviations: anti-HT=anti-hypertensive; CCB=calcium channel blocker; CI=confidence interval; HR=hazard ratio.

<sup>1</sup> Competing risk model adjusted for age at baseline, race/ethnicity (Non-Hispanic white, Black, Hispanic, Asian or Pacific Islander, and American Indian/Alaska Native), BMI (<25, 25-<30 and ≥30 kg/m<sup>2</sup>), smoking status (never, former and current), alcohol consumption (< 3 drinks/day and ≥ 3 drinks/day), self-reported type II diabetes at baseline (yes or no), and self-reported hypertension at baseline (yes or no)

<sup>2</sup> Ever use of anti-HT drugs other than the one of interest

Supplementary Figure S1. Average serum sRAGE level by single anti-HT medication use among controls in the WHI Study (N =1,522)

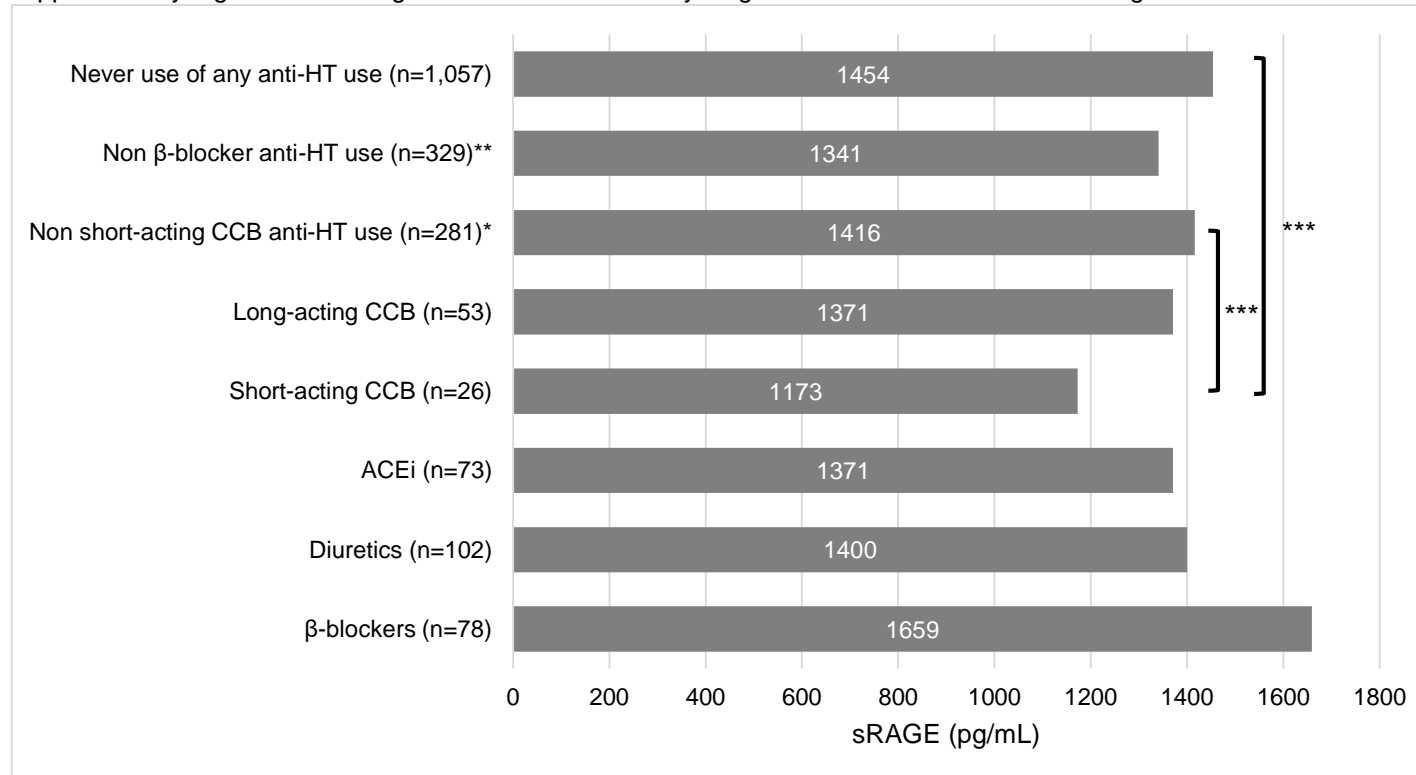

Abbreviations: ACEi=Angiotensin converting enzyme inhibitor; CCB=Calcium channel blocker; DHP=Dihydropyridine; NDHP=Non-dihydropyridine; sRAGE=soluble receptor for advanced glycation end products

\* Including ever use of ACEi, diuretics, β-blockers, or DHP CCB

\*\* Including ever use of ACEi, diuretics, β-blockers, or long-acting CCB

\*\*\*  $P < 0.05$ , Sidak multiple comparison adjustment applied to compute  $P$ -value based on model adjusted for age at baseline, BMI ( $< 25$ ,  $25 - < 30$  and  $\geq 30$  kg/m<sup>2</sup>), smoking status (never, former and current), alcohol consumption ( $< 3$  drinks/day and  $\geq 3$  drinks/day), self-reported type 2 diabetes at baseline (yes or no) and self-reported hypertension at baseline (yes or no)
